# Supplementary material for: Nanocluster catalysts for the electrochemical conversion of carbon dioxide
Source: Royal Society of Chemistry journal article supplement (doi:10.1039/d4se00533c), 2024-01-01
Supplement: d4se00533c1.pdf [file d4se00533c1.pdf]

Table 1 Summary of metal nanoclusters for CO<sub>2</sub> reduction reaction.

| Cluster           | Catalyst                               | Support                         | Particle size (nm) | Product                          | Activity |                                        |                       |               | Ref. |
|-------------------|----------------------------------------|---------------------------------|--------------------|----------------------------------|----------|----------------------------------------|-----------------------|---------------|------|
|                   |                                        |                                 |                    |                                  | FE (%)   | Current density (mA cm <sup>-2</sup> ) | Potential (V vs. RHE) | Stability (h) |      |
| Cu                | Cu clusters/<br>DRC                    | Defect-rich carbon              | ≈1                 | CH <sub>4</sub>                  | 81.7     | -18                                    | -1                    | 40            | 1    |
| Cu                | CuHHT<br>P                             | metal-organic framework ZIF-8   | 3.5                | CH <sub>4</sub>                  | 73       | -10.8                                  | -1.4                  | -             | 2    |
| Cu                | CuNC-DCD                               | incorporated with dicyandiamide | 1                  | CO                               | 93.5     | -11.25                                 | -0.05                 | -             | 3    |
| Au                | Au50Pb50                               | metallic Pb NPs                 | ~5                 | CH <sub>4</sub>                  | 2.8      | -0.3                                   | -1.07                 | 3             | 4    |
| Ni                | A-Ni-NSG                               | N-doped graphene                | ~0.2               | CO                               | 98       | -22                                    | -0.5                  | 100           | 5    |
| Ni                | NiN <sub>x</sub> -600                  | XC-72R carbon                   | -                  | CO                               | ~100     | -61.85                                 | -1.2                  | 10            | 6    |
| Fe                | Fe-N-PC                                | Porous carbon nanosphere        | ~2                 | CO                               | >90      | -11.4                                  | -0.49                 | -             | 7    |
| Sb                | Sb-Cu <sub>2</sub> O                   | Cu <sub>2</sub> O               | 12-15              | CO                               | 96       | -37.3                                  | -0.8                  | 40            | 8    |
| In <sub>2</sub> O | Ag <sub>2</sub> -In <sub>8</sub> /C NC | Ag NP                           | ~5                 | HCOOH                            | 95.5     | -3.53                                  | -0.9                  | 7             | 9    |
| MoP               | MoP-Im                                 | -                               | 8-10               | C <sub>2</sub> H <sub>5</sub> OH | 77.4     | -90                                    | -0.2                  | 110           | 10   |
| Cu                | EOR-Cu(bipy)Br                         | -                               | ~1                 | CH <sub>4</sub>                  | ~50      | -300                                   | -0.8                  | -             | 11   |
|                   | ER-Cu(bipy)Br                          | -                               | ~2.5               | C <sub>2</sub> H <sub>4</sub>    | 20-40    | -150-350                               | -0.8                  | -             |      |
| SnO <sub>x</sub>  | SnO <sub>x</sub> /ZC                   | ZIF 8-derived carbon            | ~1                 | HCOOH                            | 90.5     | -200                                   | -0.67                 | 10            | 12   |
| PdMo              | Pd <sub>7</sub> Mo <sub>1</sub> /ZC    | ZIF 8-derived carbon            | ~2-4               | CO                               | ~40      | -200                                   | -0.9                  | -             | 13   |
| PdNi              | Pd <sub>2</sub> Ni <sub>8</sub> /ZC    | ZIF 8-derived                   | ~2                 | CO                               | 95.3     | -200                                   | -0.56                 | -             | 14   |

## REFERENCES

1. Q. Hu, Z. Han, X. Wang, G. Li, Z. Wang, X. Huang, H. Yang, X. Ren, Q. Zhang, J. Liu and C. He. Facile Synthesis of Sub-Nanometric Copper Clusters by Double Confinement Enables Selective Reduction of Carbon Dioxide to Methane. *Angewandte Chemie International Edition*, 2020, **59**, 19054–19059.
2. J.-D. Yi, R. Uikuan Xie, Z. A.-L. Xie, G.-L. Chai, T.-F. Liu, R.-P. Chen, Y.-B. Huang and R. Cao. Highly Selective CO<sub>2</sub> Electroreduction to CH<sub>4</sub> by In Situ Generated Cu<sub>2</sub>O Single-Type Sites on a Conductive MOF: Stabilizing Key Intermediates with Hydrogen Bonding. *Angewandte Chemie*, 2020, **132**, 23849–23856.
3. L. Yan, X.-D. Liang, Y. Sun, L.-P. Xiao, B.-A. Lu, G. Li, Y.-Y. Li, Y.-H. Hong, L.-Y. Wan, C. Chen, J. Yang, Z.-Y. Zhou, N. Tian and S.-G. Sun. Evolution of Cu single atom catalysts to nanoclusters during CO<sub>2</sub> reduction to CO<sup>†</sup>. *Chemical Communications*, 2022, **58**, 2488–2491.
4. A. M. Ismail, G. F. Samu, H. C. Nguy n, E. Csap , N. L pez and C. Jan ky. Au/Pb Interface Allows the Methane Formation Pathway in Carbon Dioxide Electroreduction. *ACS Catal*, 2020, **10**, 5681–5690.
5. H. Bin Yang, S. F. Hung, S. Liu, K. Yuan, S. Miao, L. Zhang, X. Huang, H. Y. Wang, W. Cai, R. Chen, J. Gao, X. Yang, W. Chen, Y. Huang, H. M. Chen, C. M. Li, T. Zhang and B. Liu. Atomically dispersed Ni(i) as the active site for electrochemical CO<sub>2</sub> reduction. *Nat Energy*, 2018, **3**, 140–147.
6. Q. Hao, D.-X. Liu, R. Deng and H.-X. Zhong. Boosting Electrochemical Carbon Dioxide Reduction on Atomically Dispersed Nickel Catalyst. *Front Chem*, 2022, **9**,.
7. Y. Chen, L. Zou, H. Liu, C. Chen, Q. Wang, M. Gu, B. Yang, Z. Zou, J. Fang and H. Yang. Fe and N Co-Doped Porous Carbon Nanospheres with High Density of Active Sites for Efficient CO<sub>2</sub> Electroreduction. *The Journal of Physical Chemistry C*, 2019, **123**, 16651–16659.
8. J. Zeng, M. R. Fiorentin, M. Fontana, M. Castellino, F. Risplendi, A. Sacco, G. Cicero, M. A. Farkhondehfal, F. Drago and C. F. Pirri. Novel Insights into Sb-Cu Catalysts for Electrochemical Reduction of CO<sub>2</sub>. *Appl Catal B*, 2022, **306**, 121089.
9. D. Bhalothia, H.-Y. Liu, S.-H. Chen, Y.-T. Tseng, W. Li, S. Dai, K.-W. Wang and T.-Y. Chen. The sub-nanometer In<sub>2</sub>O clusters on Ag nanoparticles with highly selective electrochemical CO<sub>2</sub> reduction to formate. *Chemical Engineering Journal*, 2024, **481**, 148295.
10. M. Esmailirad, A. Kondori, N. Shan, M. T. Saray, S. Sarkar, A. M. Harzandi, C. M. Megaridis, R. Shahbazian-Yassar, L. A. Curtiss, C. U. Segre and M. Asadi. Efficient electrocatalytic conversion of CO<sub>2</sub> to ethanol enabled by imidazolium-functionalized ionomer confined molybdenum phosphide. *Appl Catal B*, 2022, **317**, 121681.

11. H. Zhang, Y. Yang, Y. Liang, J. Li, A. Zhang, H. Zheng, Z. Geng, F. Li and J. Zeng. Molecular Stabilization of Sub-Nanometer Cu Clusters for Selective CO<sub>2</sub> Electromethanation. *ChemSusChem*, 2022, **15**, e202102010.
12. H. Kim, K. Lee and C. W. Lee. 1 nm Tin Oxide Cluster for the Electrochemical Conversion of Carbon Dioxide to Formate at Low Overpotential. *Int J Energy Res*, 2024, **2024**, 1367542.
13. D. T. Wijaya and C. W. Lee. Pd–Mo bimetallic catalysts for electrochemical reduction of carbon dioxide to carbon monoxide. *Journal of Electroanalytical Chemistry*, 2024, **953**, 118007.
14. D. T. Wijaya, A. Haryanto, H. W. Lim, K. Jin and C. W. Lee. Sub-2 nm mixed metal oxide for electrochemical reduction of carbon dioxide to carbon monoxide. *Journal of Energy Chemistry*, 2023, **84**, 303–310.
